# Supplementary material for: Pseudomonas aeruginosa transcriptome adaptations from colonization to biofilm infection of skin wounds
Source: PubMed Central journal article supplement (PMC8526614; doi:10.1038/s41598-021-00073-4), 2021-10-19
Supplement: 41598_2021_73_MOESM11_ESM.pdf [file 41598_2021_73_MOESM11_ESM.pdf]

***Pseudomonas aeruginosa* transcriptome adaptations  
from colonization to biofilm infection of skin wounds**

Peter D'Arpa, S. L. Rajasekhar Karna, Tsute Chen, Kai P. Leung

[View using Continuous Scroll \(Preview\)](#) or [Enable Scrolling \(Acrobat\)](#).

**A**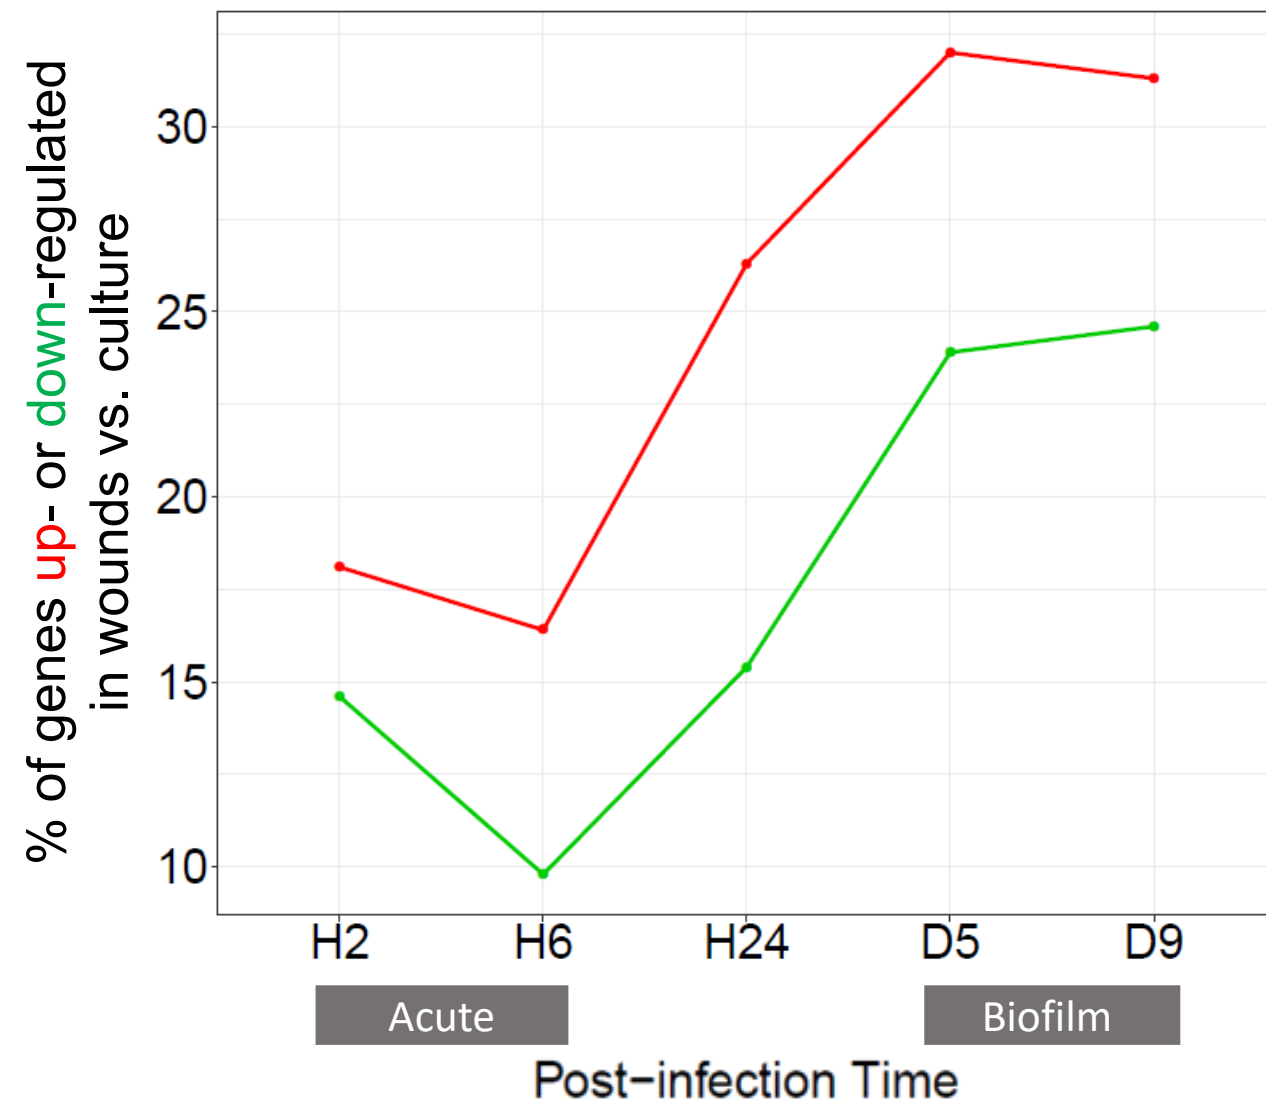**B**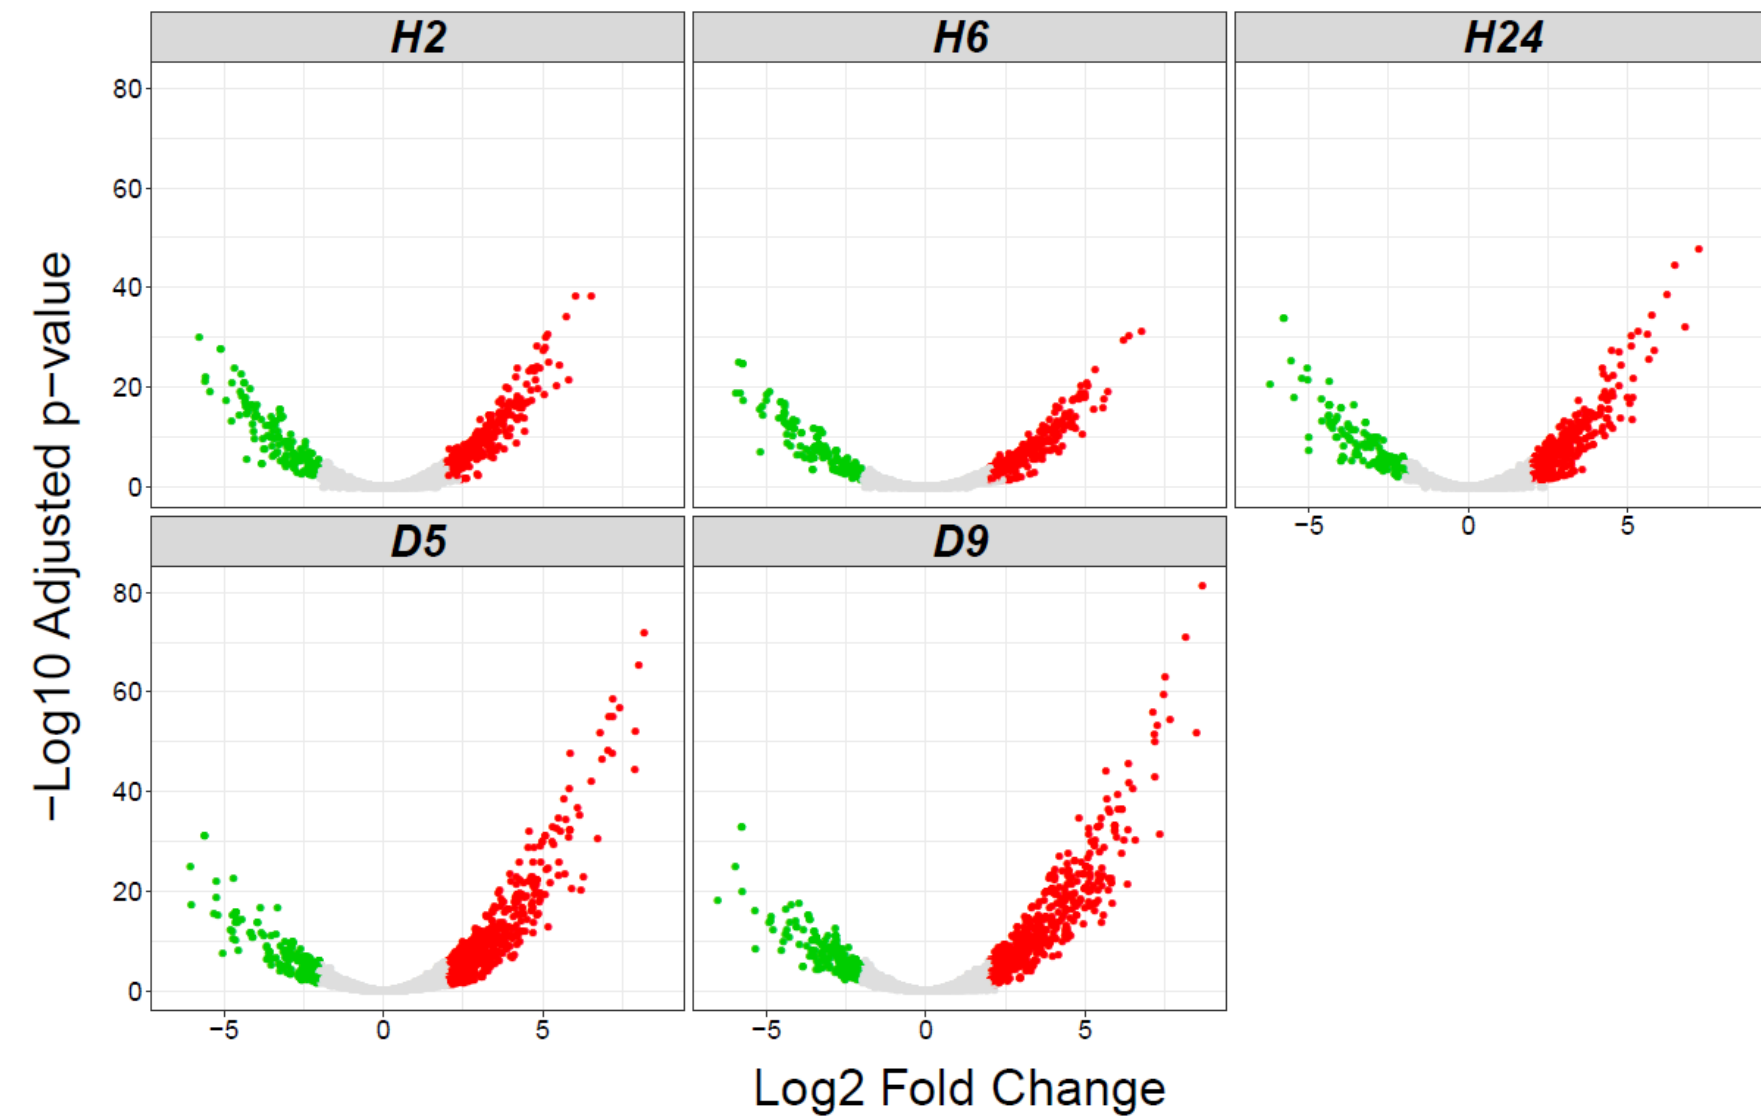

**S1 Fig.** Global gene expression of PAO1 in wounds vs. log-phase culture. (A) The percentage of genes with up- (red) and down(green)-regulated expression in wounds (false discovery rate, FDR < 0.05). (B) Volcano plots.

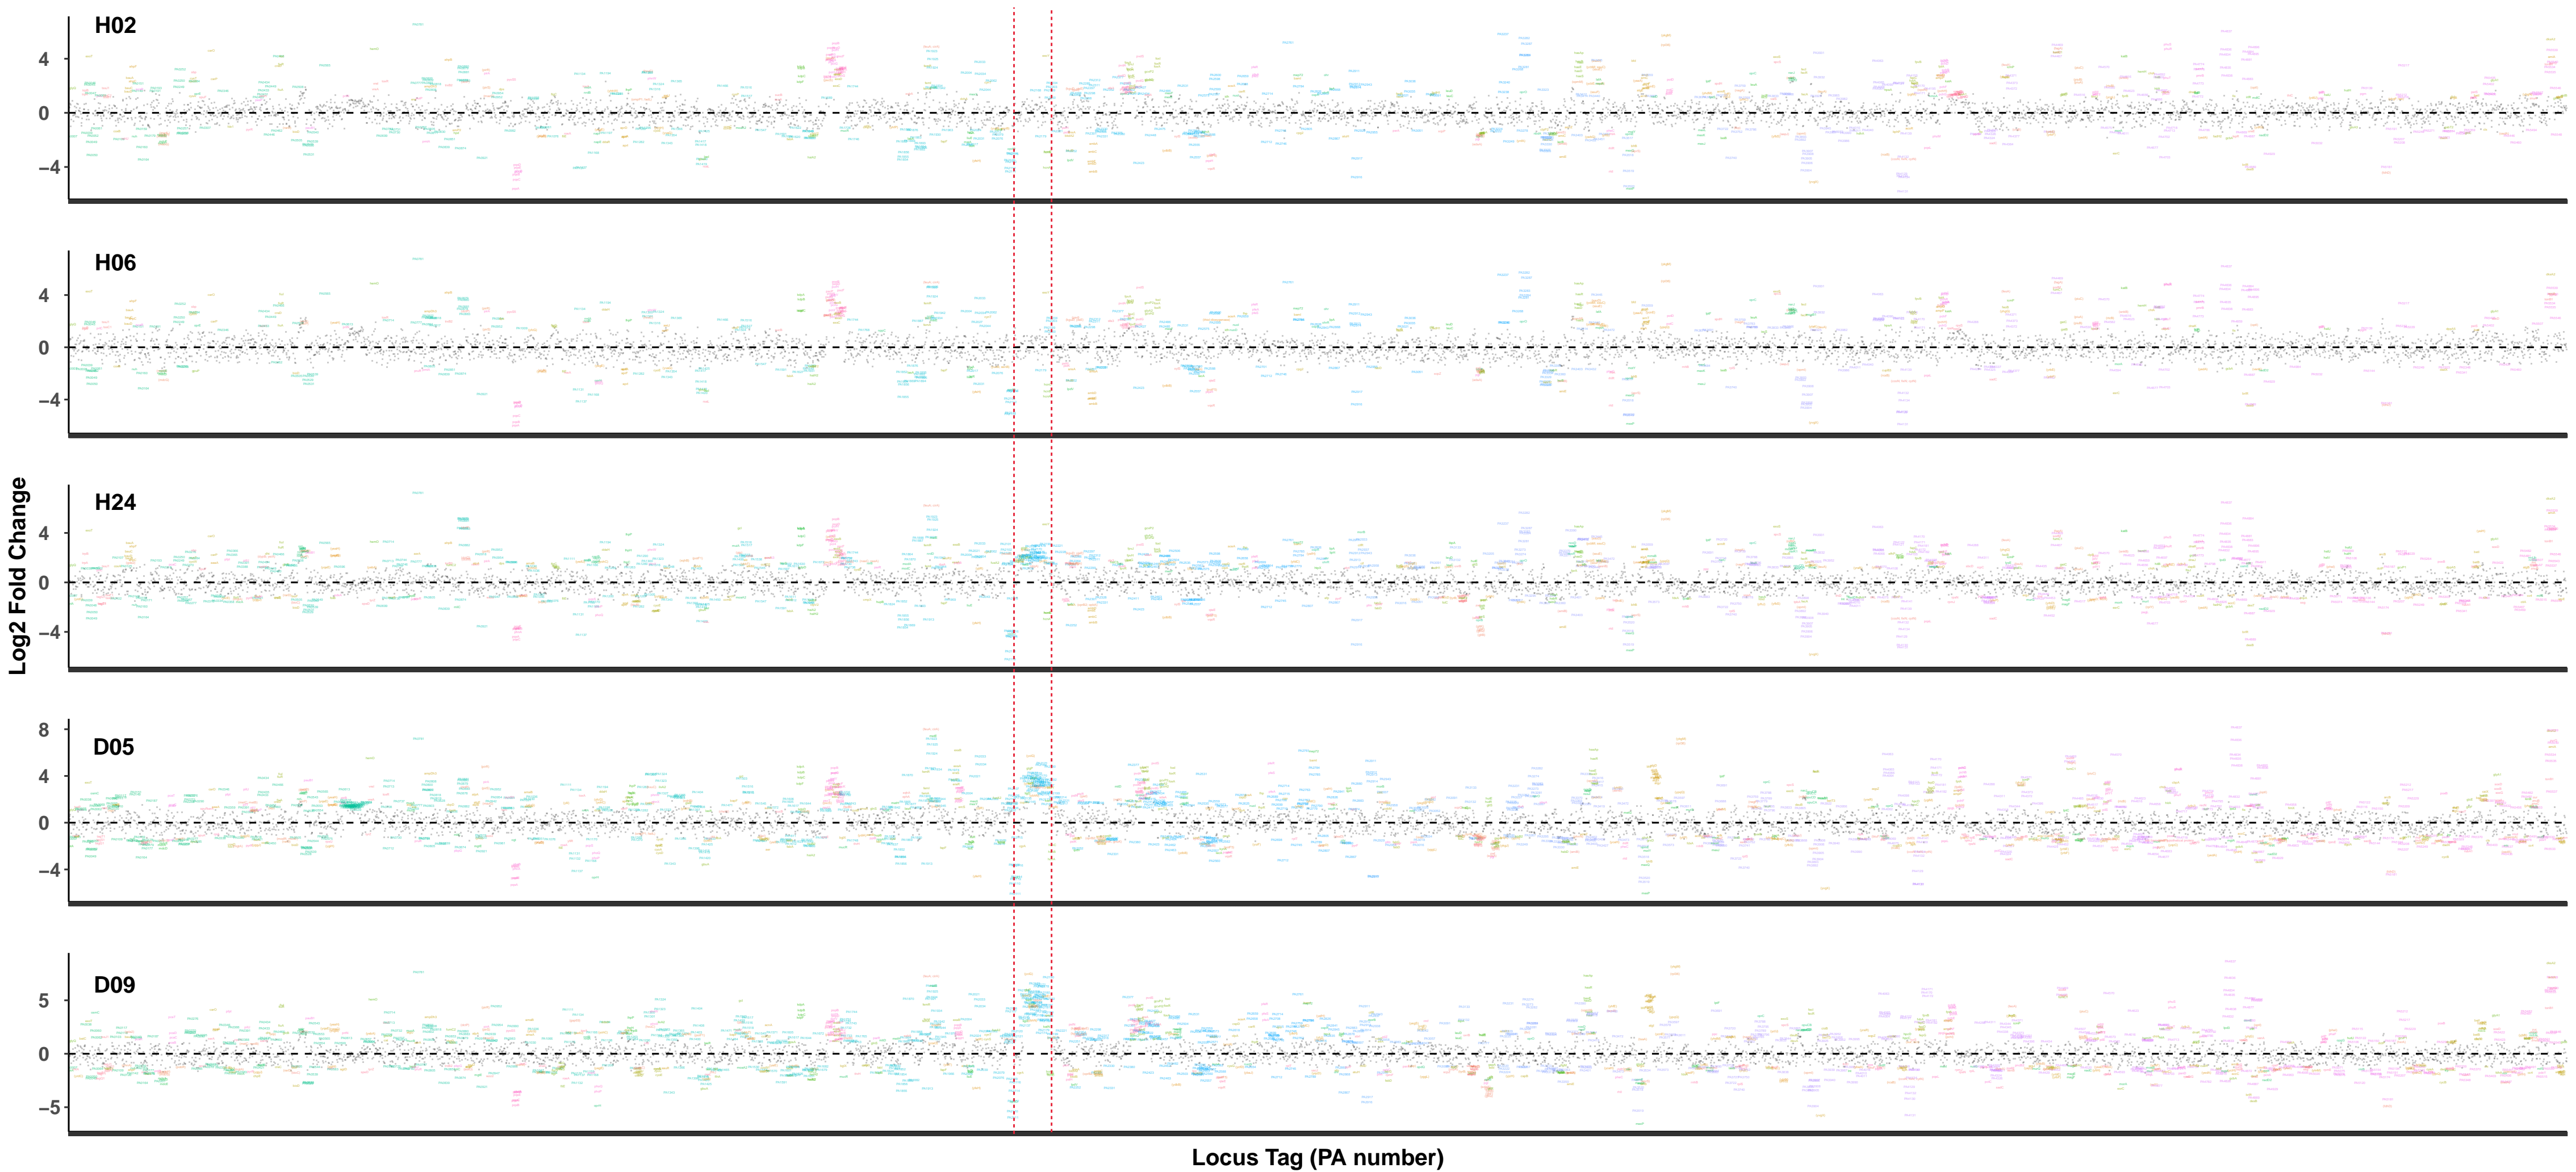

**S2 Fig.** Log2 Fold Change of PAO1 genes at in-wound times vs. log-phase culture. Genes are ordered by their position in the genome. The red dotted lines delineate PA2134 to PA2193. Gene color is alphabetical.

COG Category

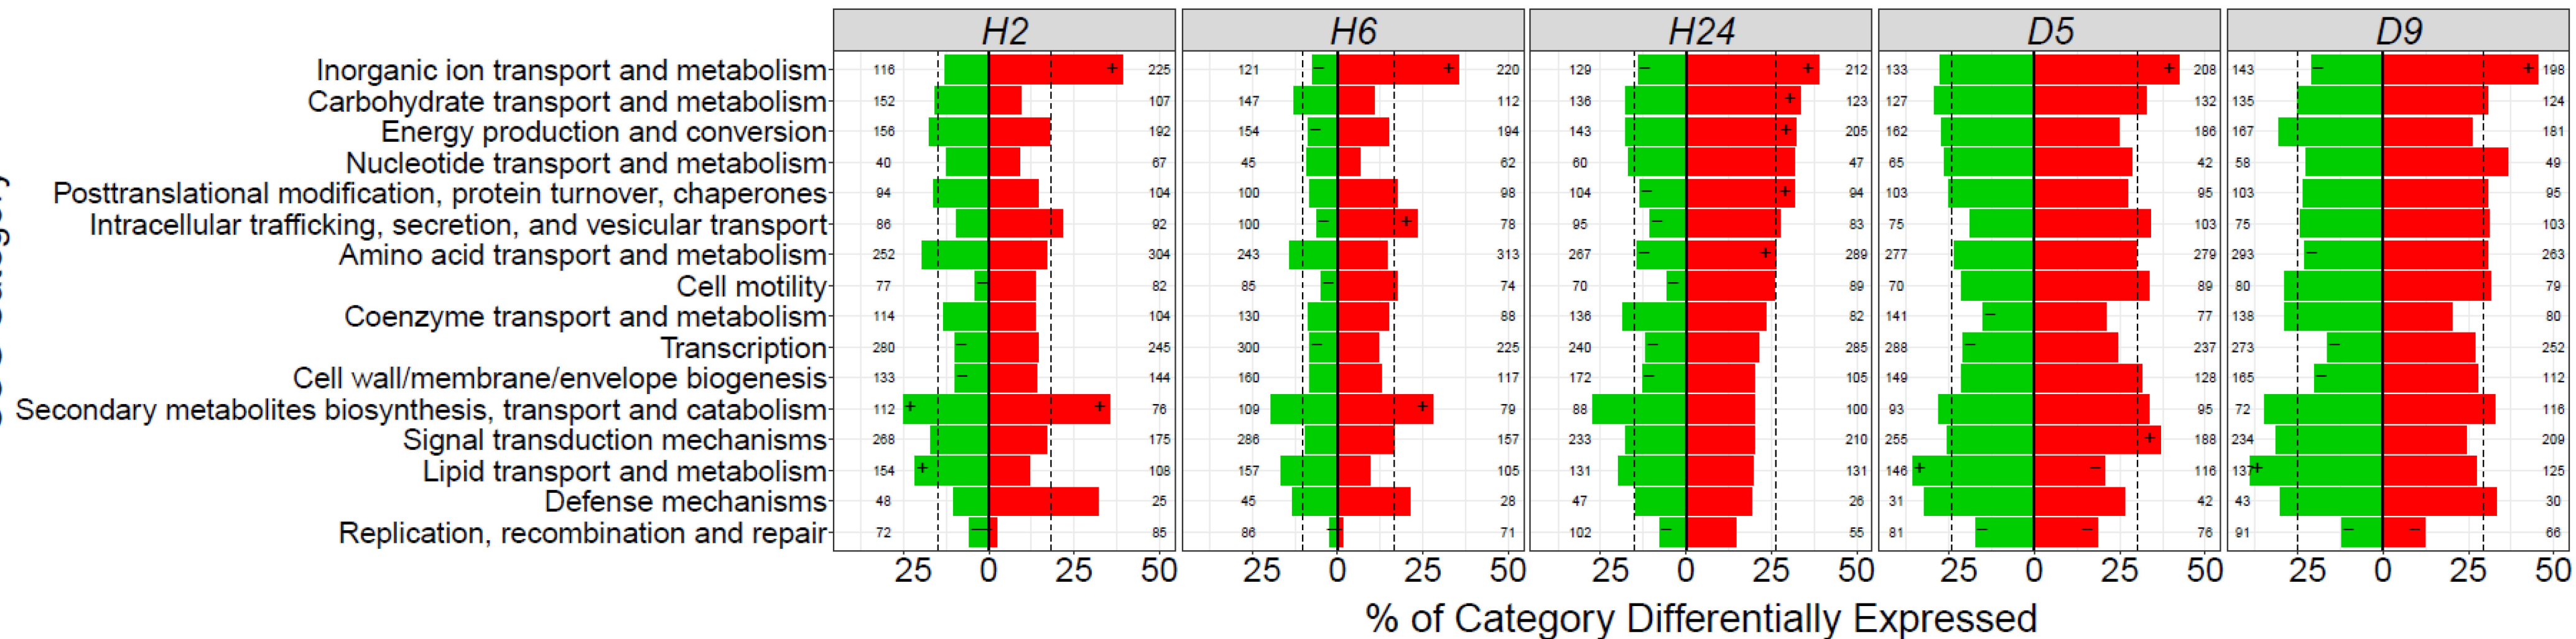



**S3 Fig. Percent of genes in COG categories differentially expressed at each in-wound time (vs. log-phase culture).** COG categories significantly overrepresented (+) or underrepresented (-) relative to the proportion of all significant up-regulated or down-regulated genes (Fisher's exact test,  $p < 0.05$ , implemented in R package GeneOverlap version 1.10.0). Dotted lines indicate the percent down- and up-regulated genes averaged across all COG categories. The COG categories are arranged from top to bottom in descending order of the percent of significantly up-regulated genes at 24 hrs. The numbers in the panels are the counts of genes per COG category (*Pseudomonas Genome DB*, PAO1 COG mappings) expressed less or more so than in log-phase culture (regardless of fold-change or FDR).

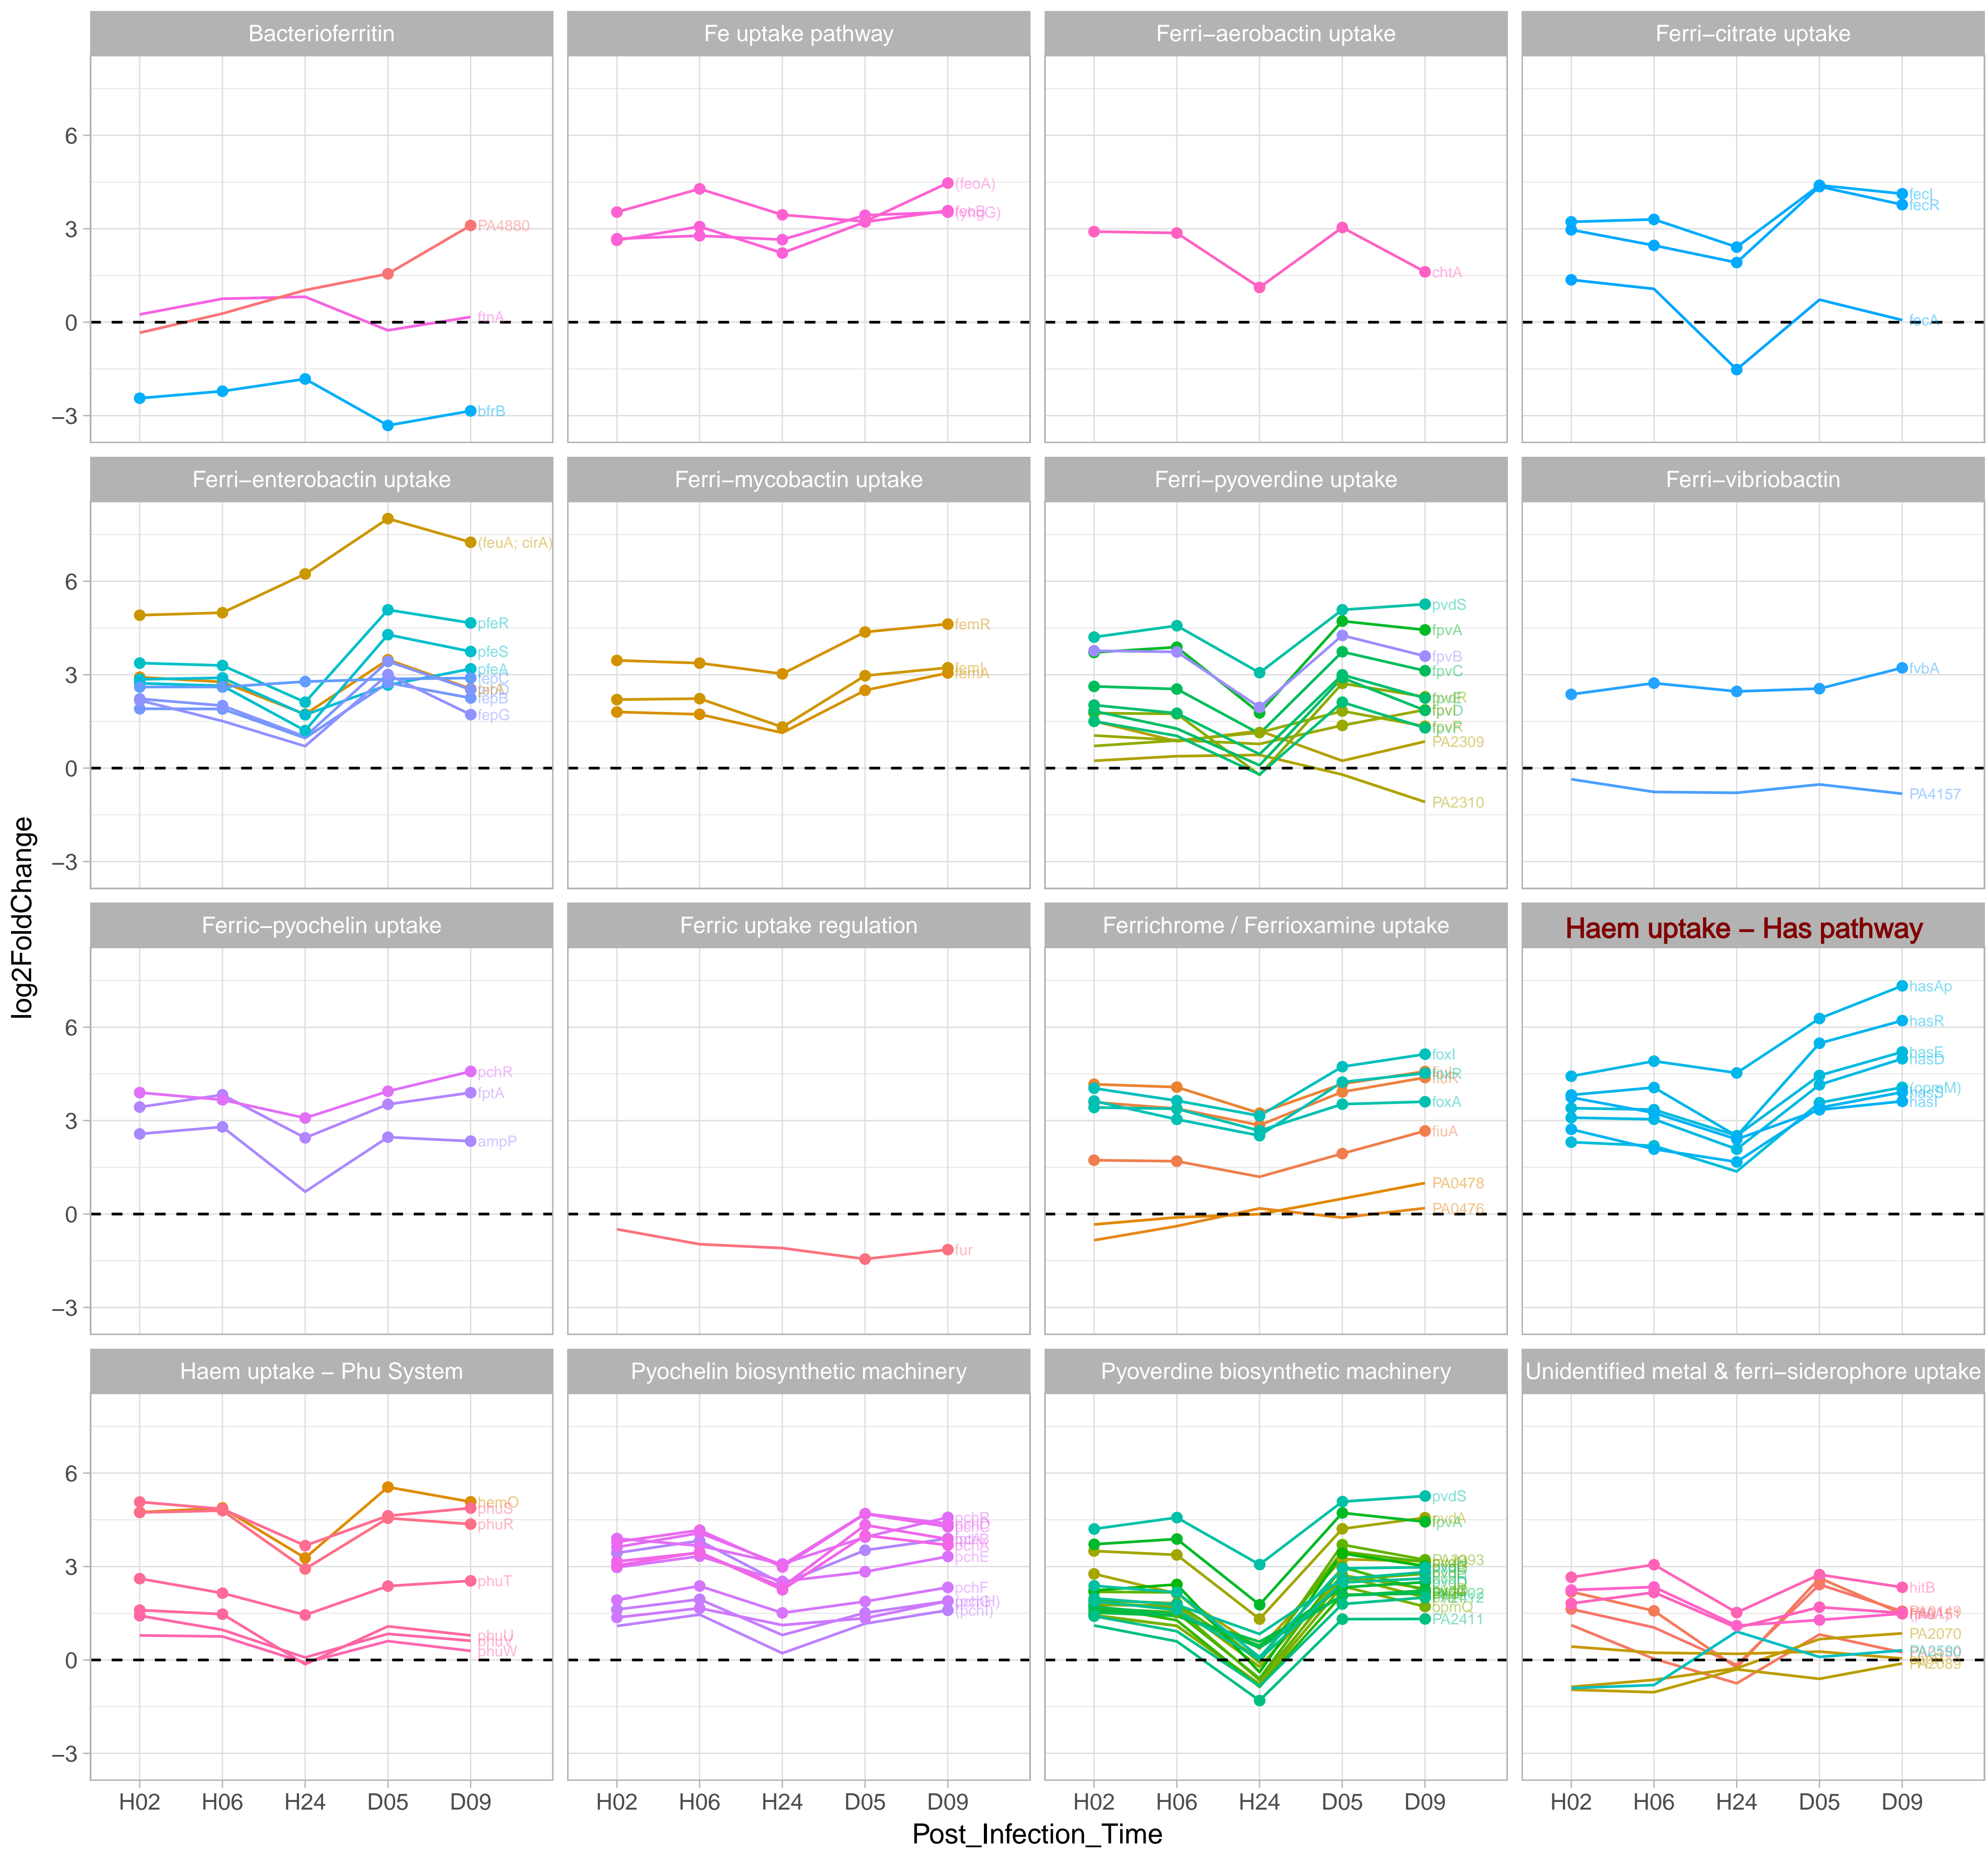



**S4 Fig.** Expression of COG, 'Inorganic ion transport and metabolism', genes in wound infection vs. log-phase culture. A solid circle indicates a significant difference in the expression of the gene in the wound vs. culture.

**Acute infection (H24) vs. Colonization (H2&H6)**

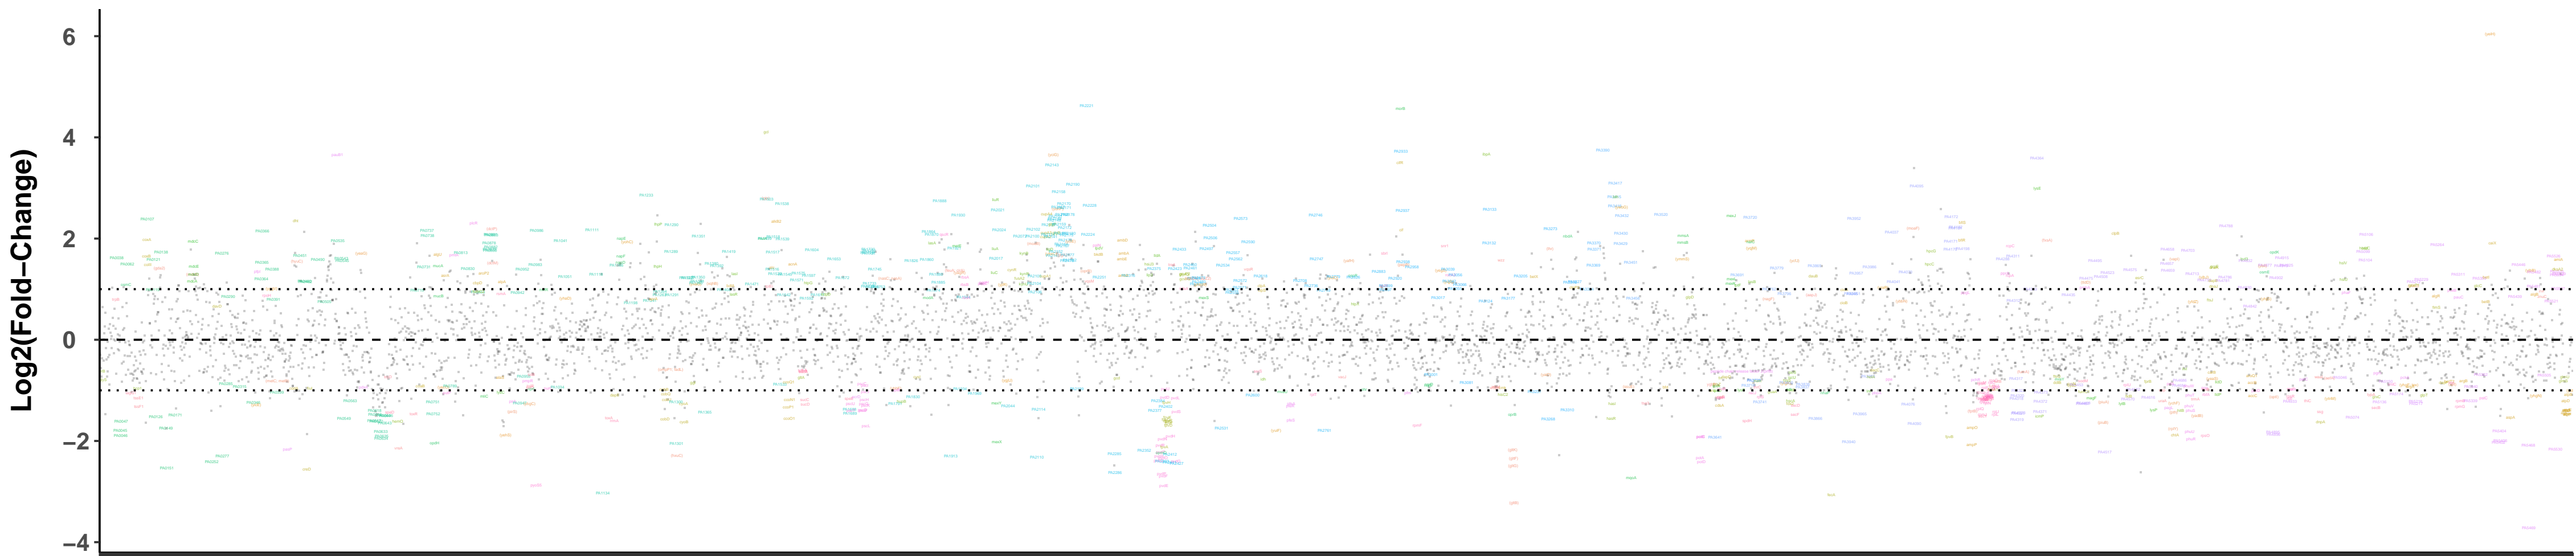

**Biofilm infection (D5&D9) vs. Colonization (H2&H6)**

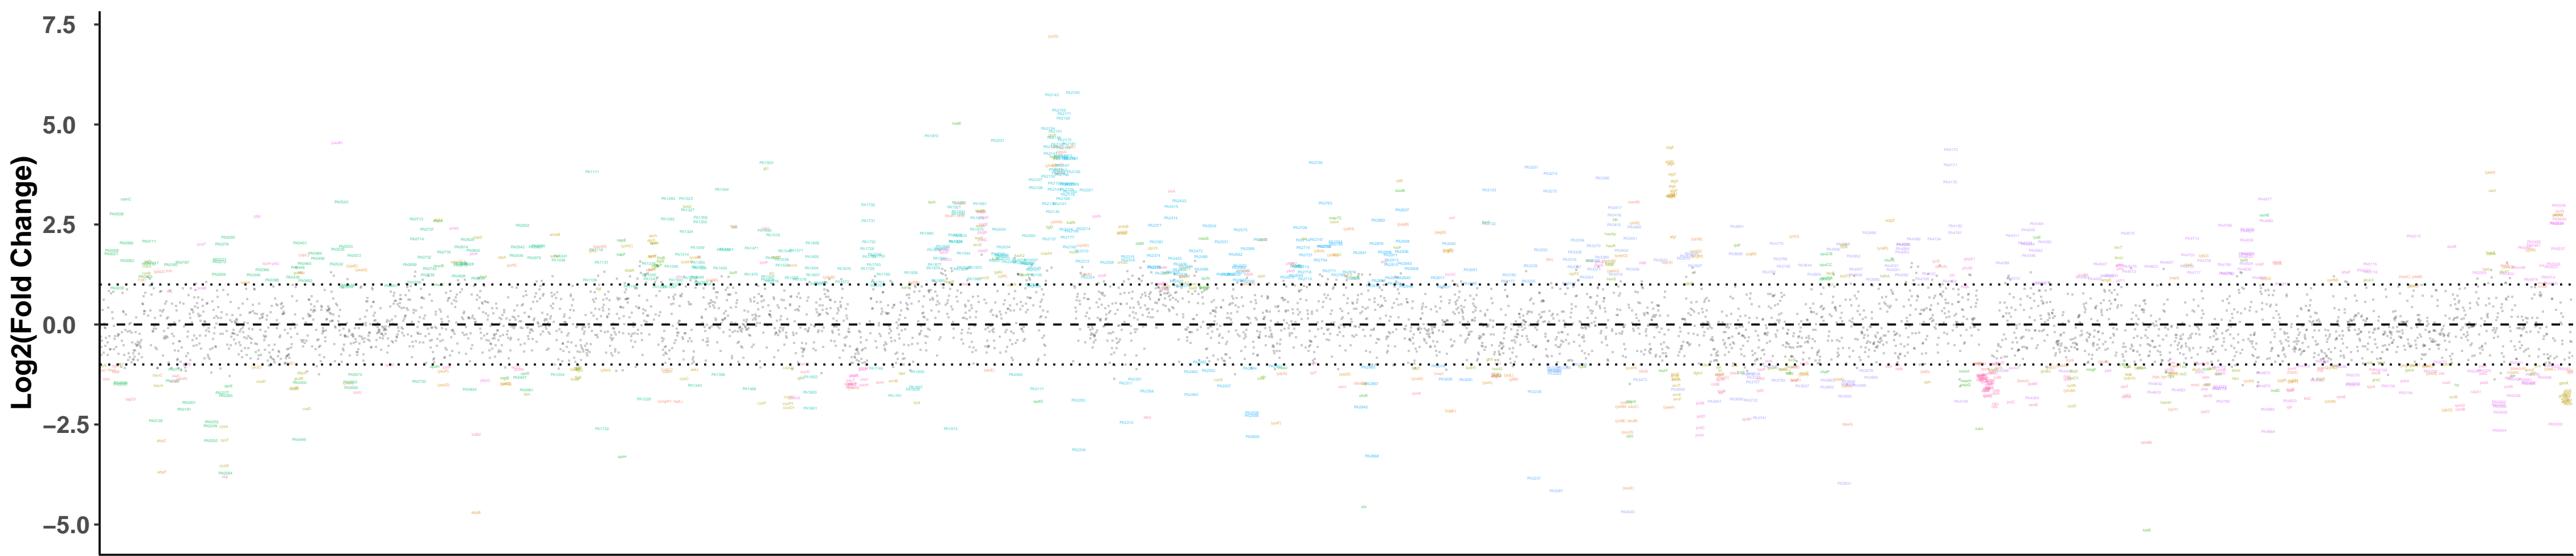

**Late biofilm (D9) vs. Early biofilm (D5) infection**

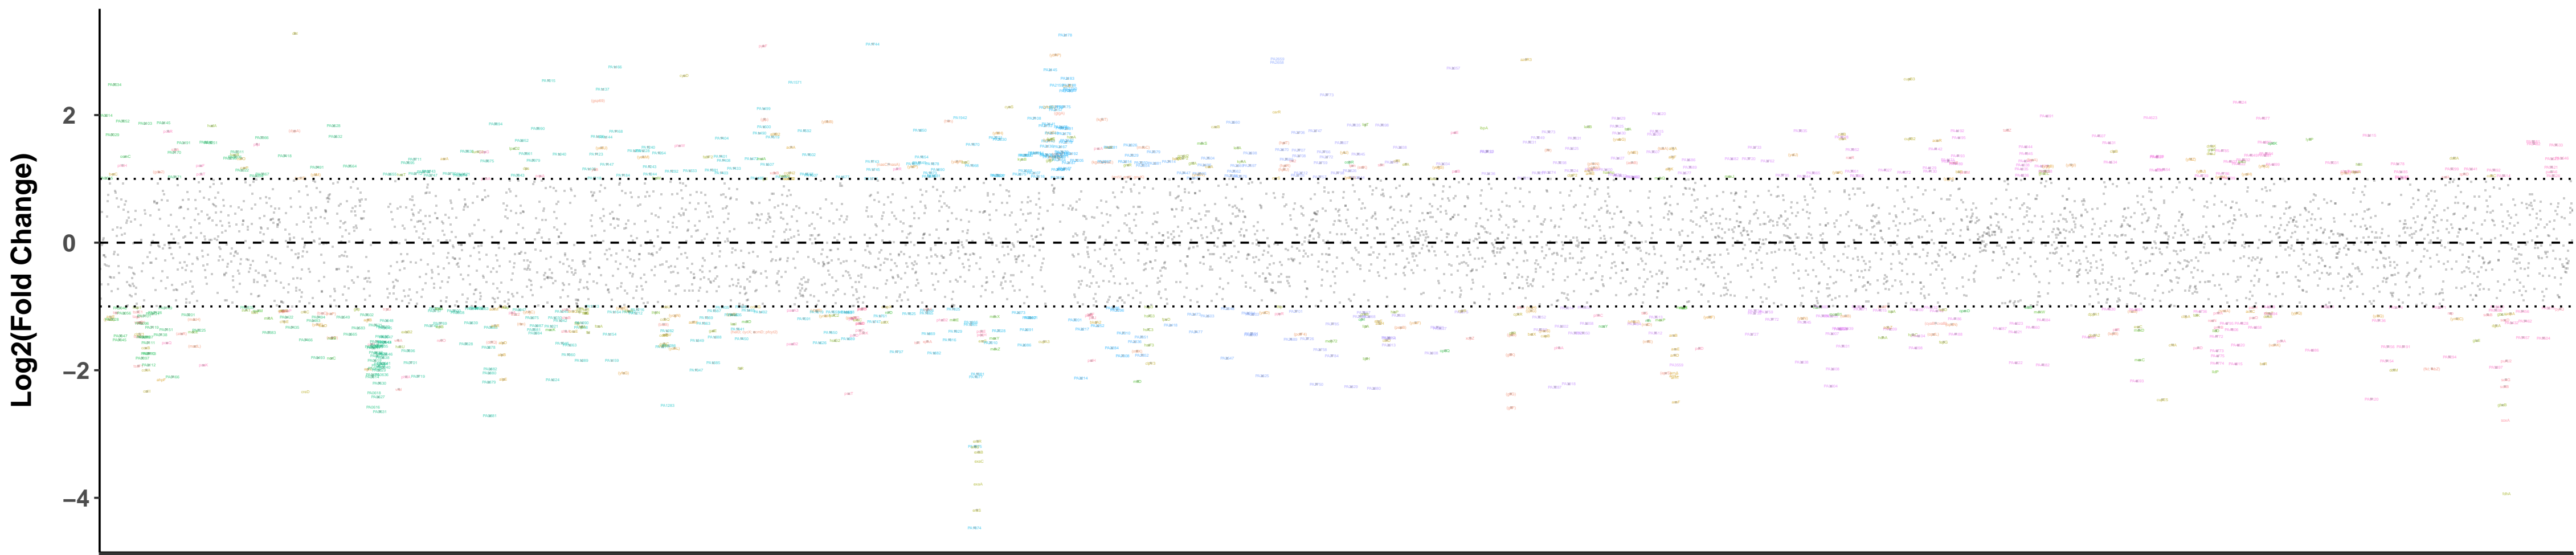

Locus Tag (PA number)

**S5 Fig.** Changes in PAO1 gene expression as wound infection developed: colonization to acute infection, colonization to biofilm infection, and earlier to later biofilm infection.



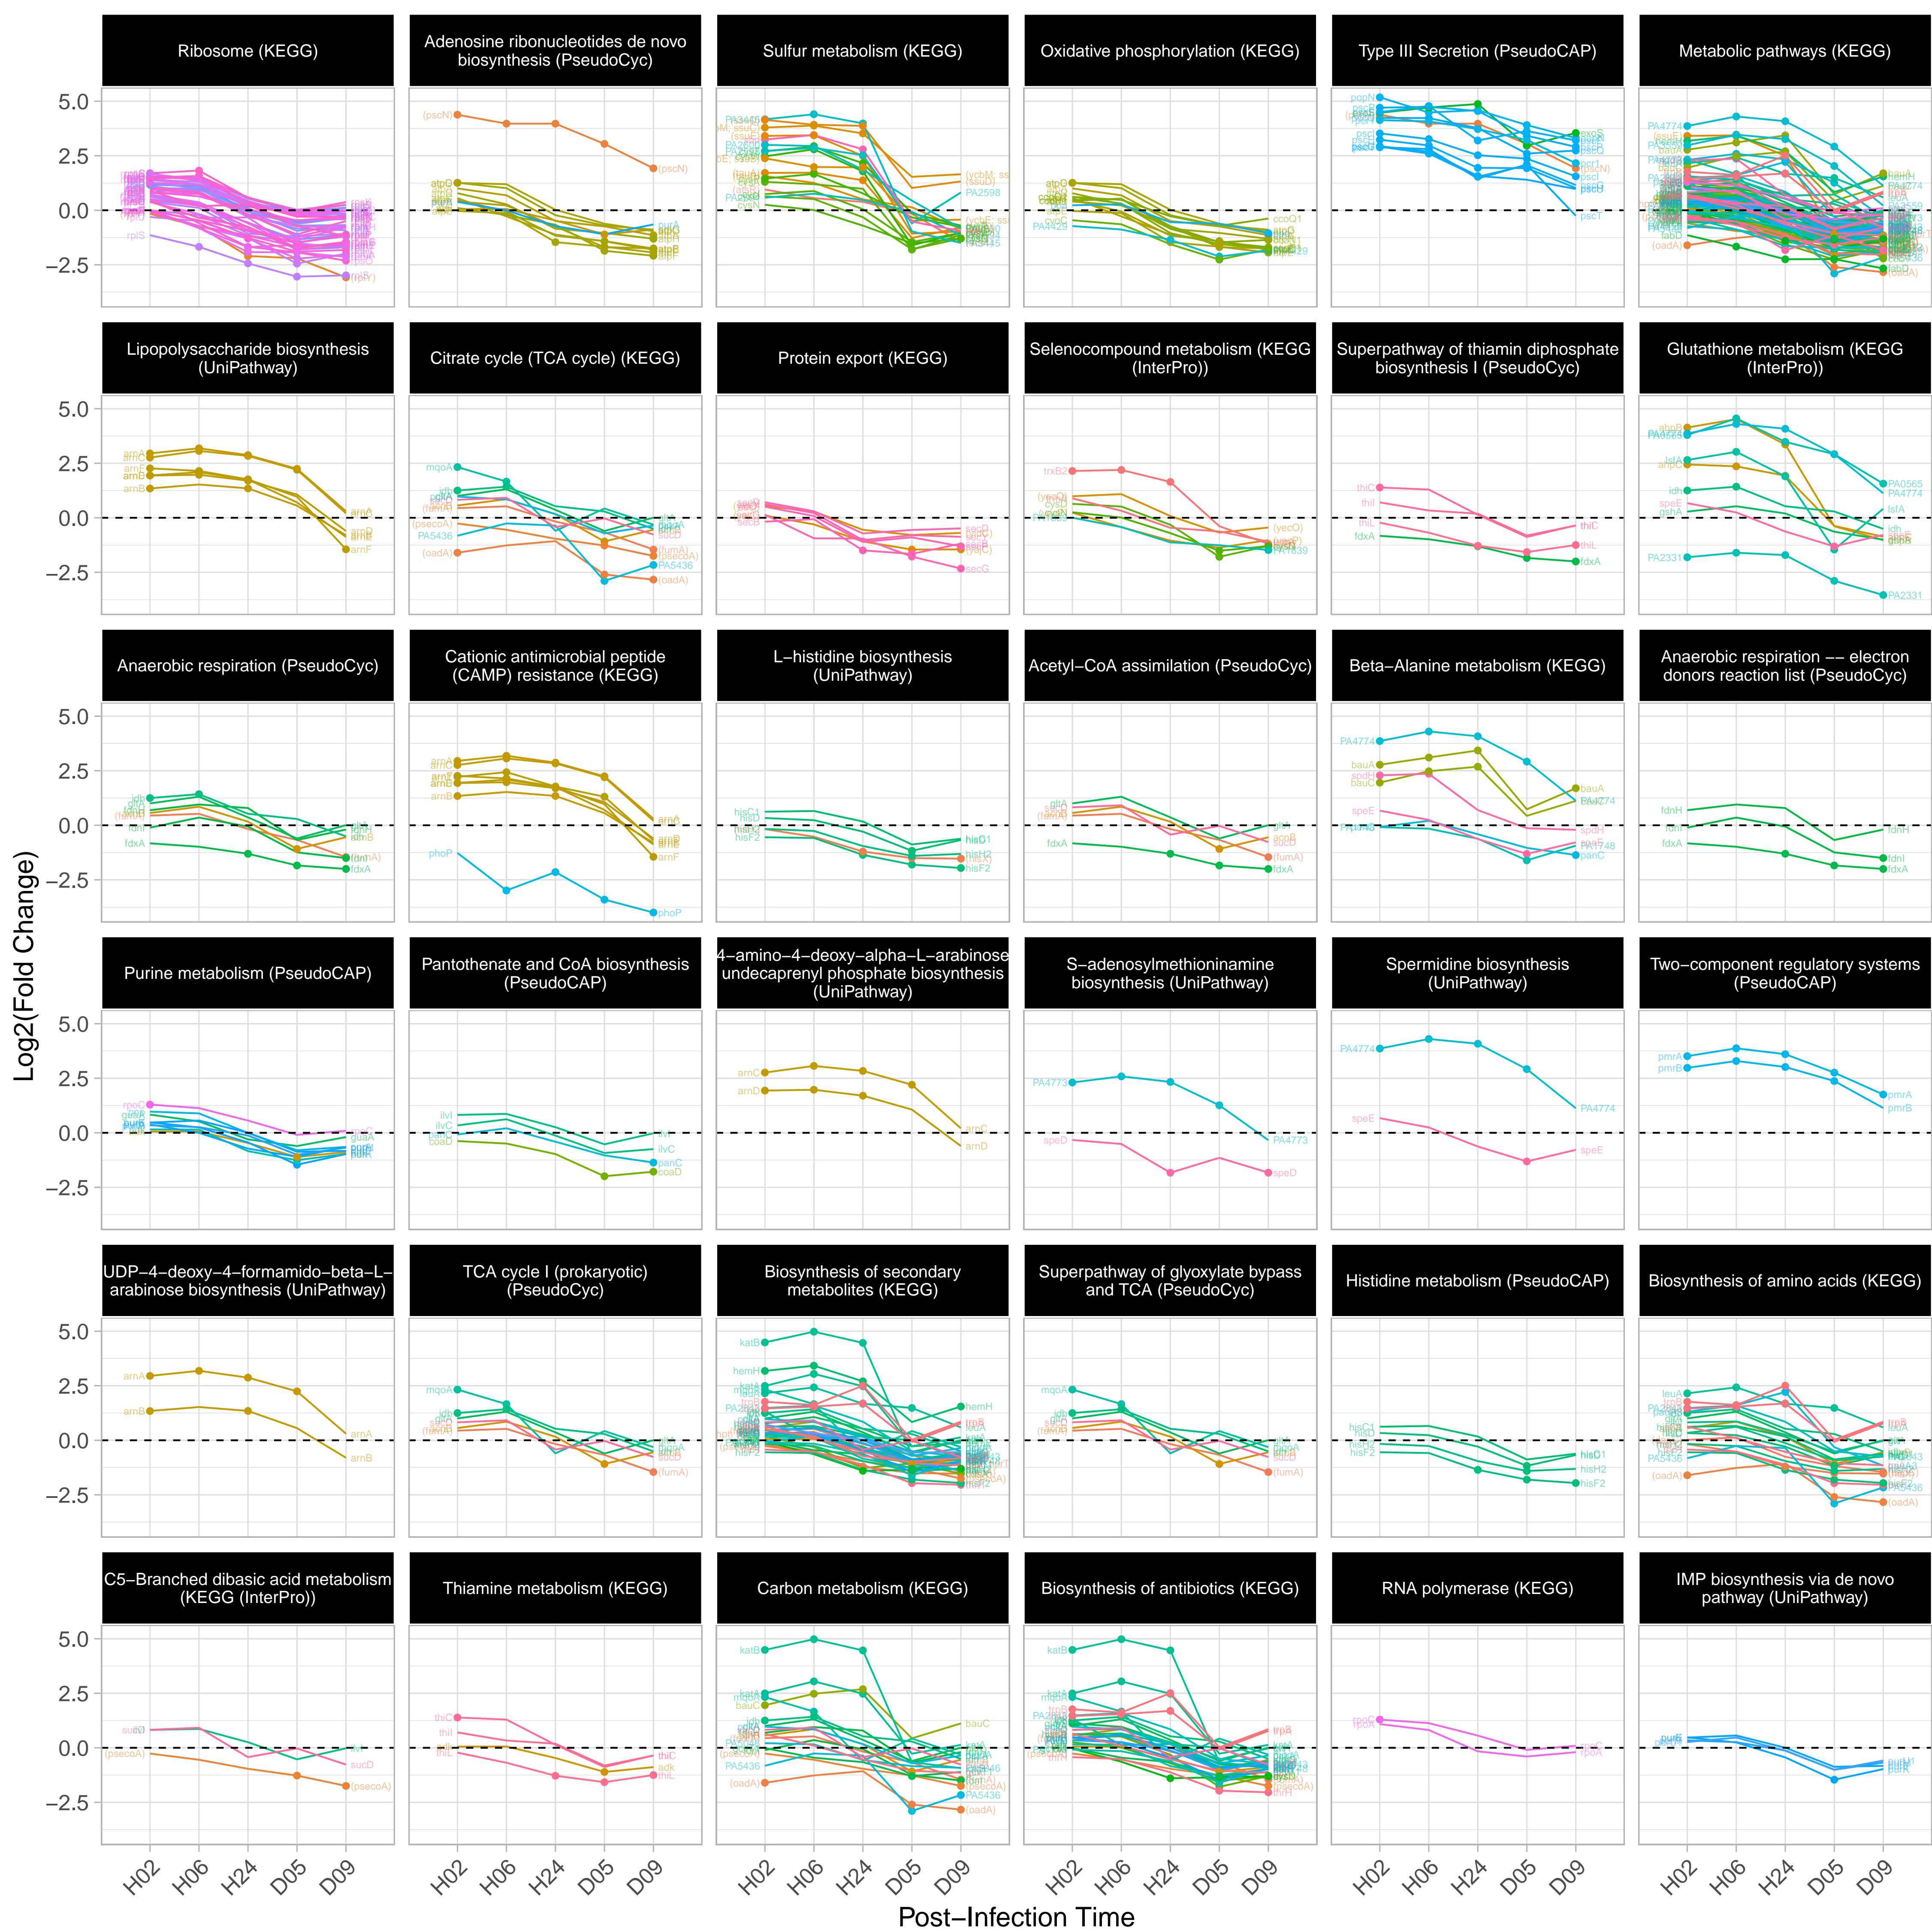

**S6 Fig. Pathways down-regulated from acute to biofilm infection.** Pathways with over-represented down-regulated genes in biofilm infection (D5&D9:H2&6) are shown with their genes plotted vs. in-wound time. Dashed lines indicate the expression level in log-phase culture. Solid circles indicate a significant gene expression difference (FDR < 0.05) between log-phase culture and wounds at each in-wound time



Up-regulated pathways from less-mature to more-mature biofilm wound infection

Down-regulated pathways from less-mature to more-mature biofilm wound infection

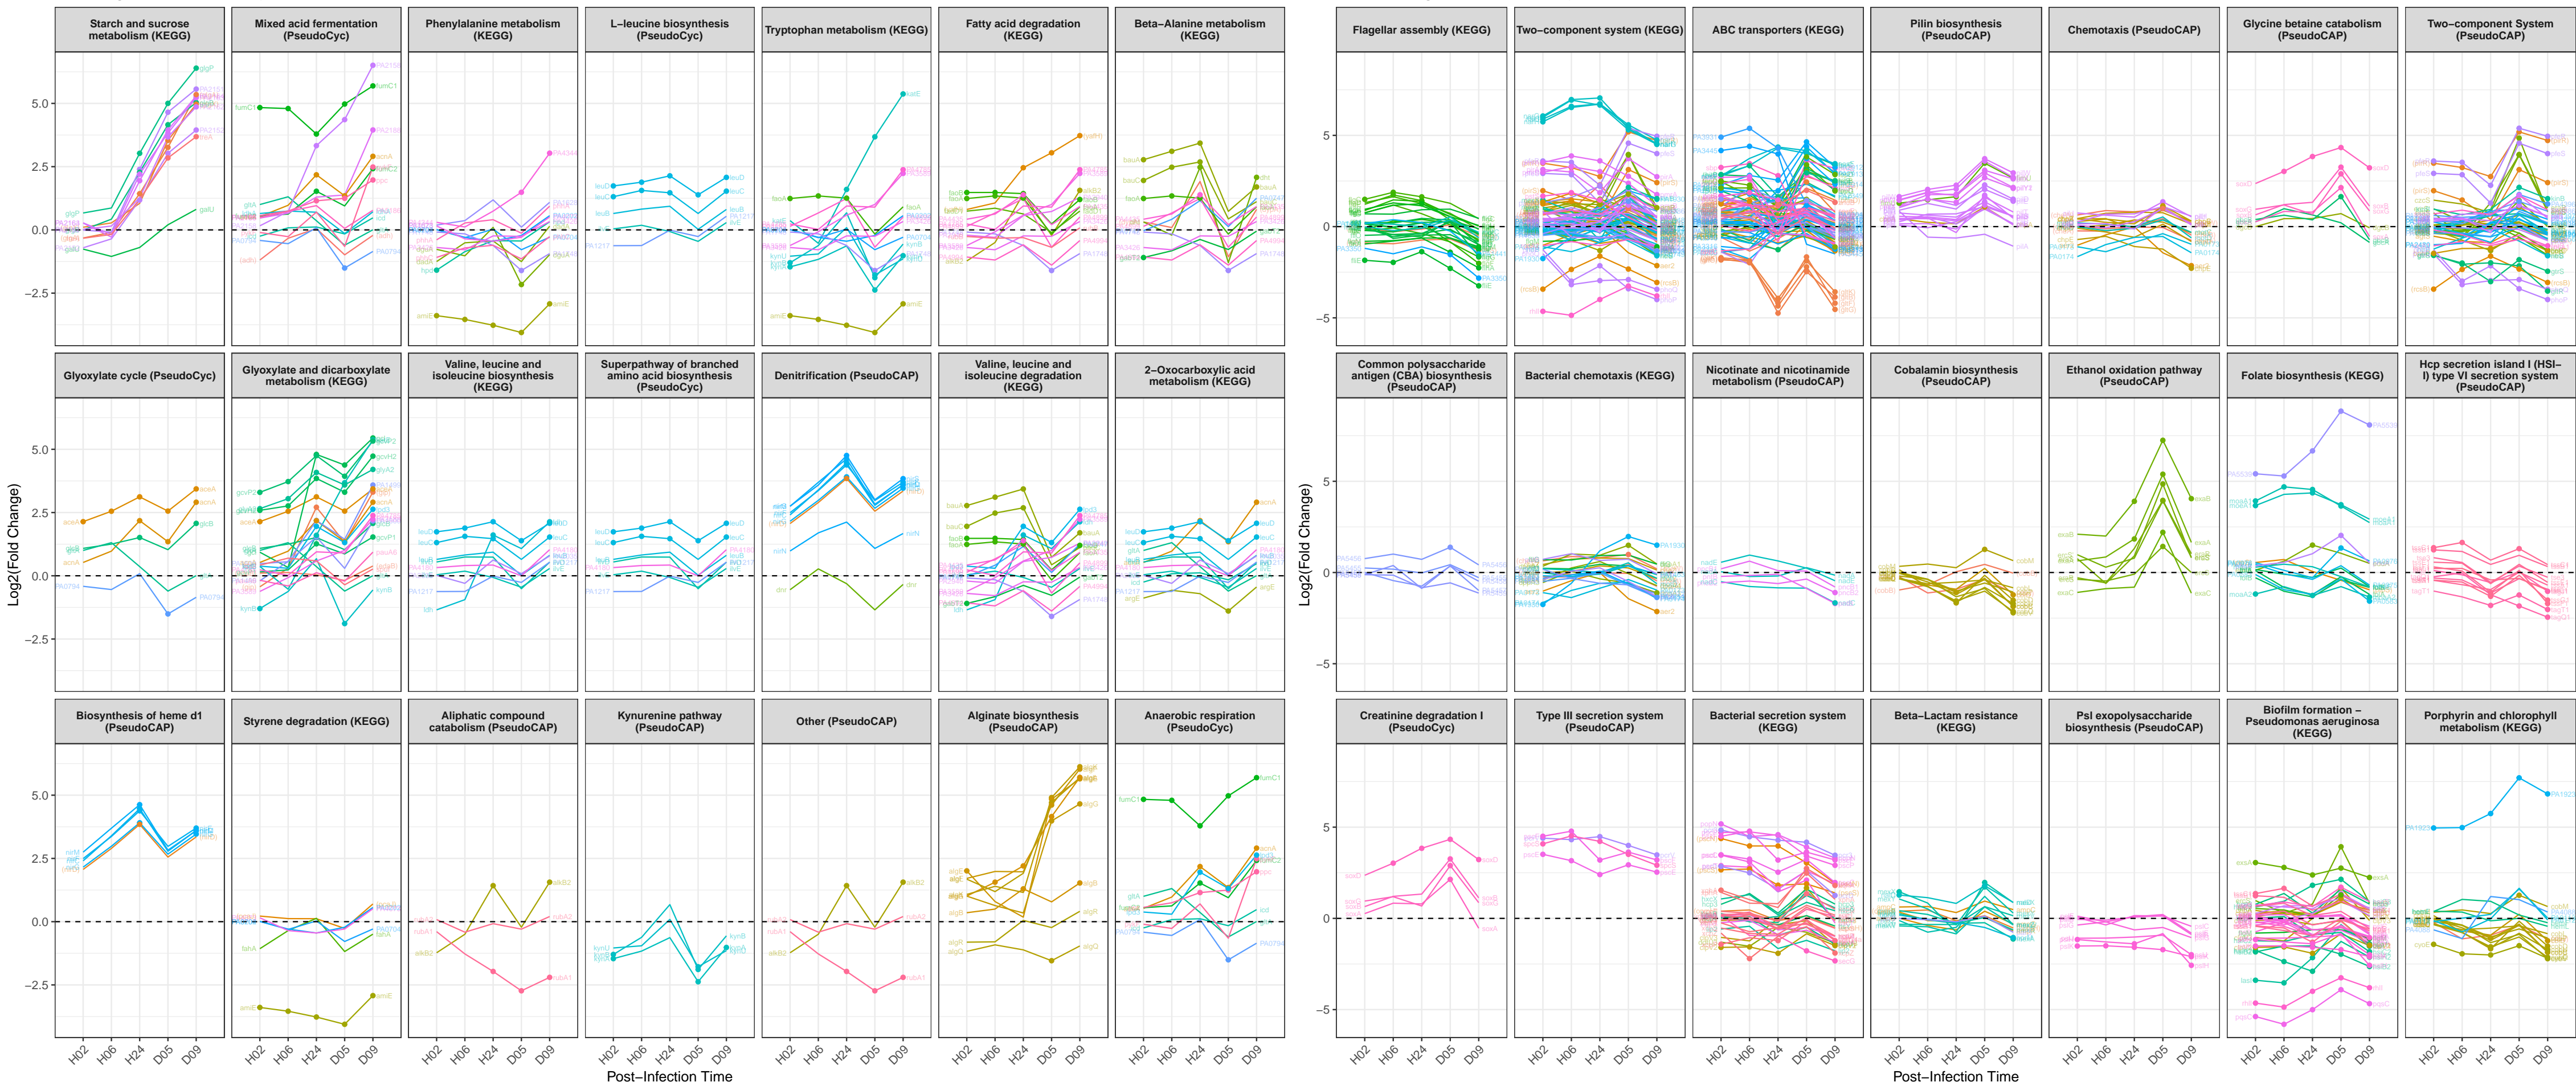

**S7 Fig.** Pathways up- and down-regulated from less-mature (D5) to more-mature (D9) *P. aeruginosa* wound infection. Genes in the pathways are plotted vs. post-infection time. Dashed lines indicate the expression level in log-phase culture. Solid circles indicate a significant gene expression difference (FDR < 0.05) between log-phase culture and wounds at each post-infection time.

# Up-regulated pathways from colonization to acute wound infection

# Down-regulated pathways from colonization to acute wound infection

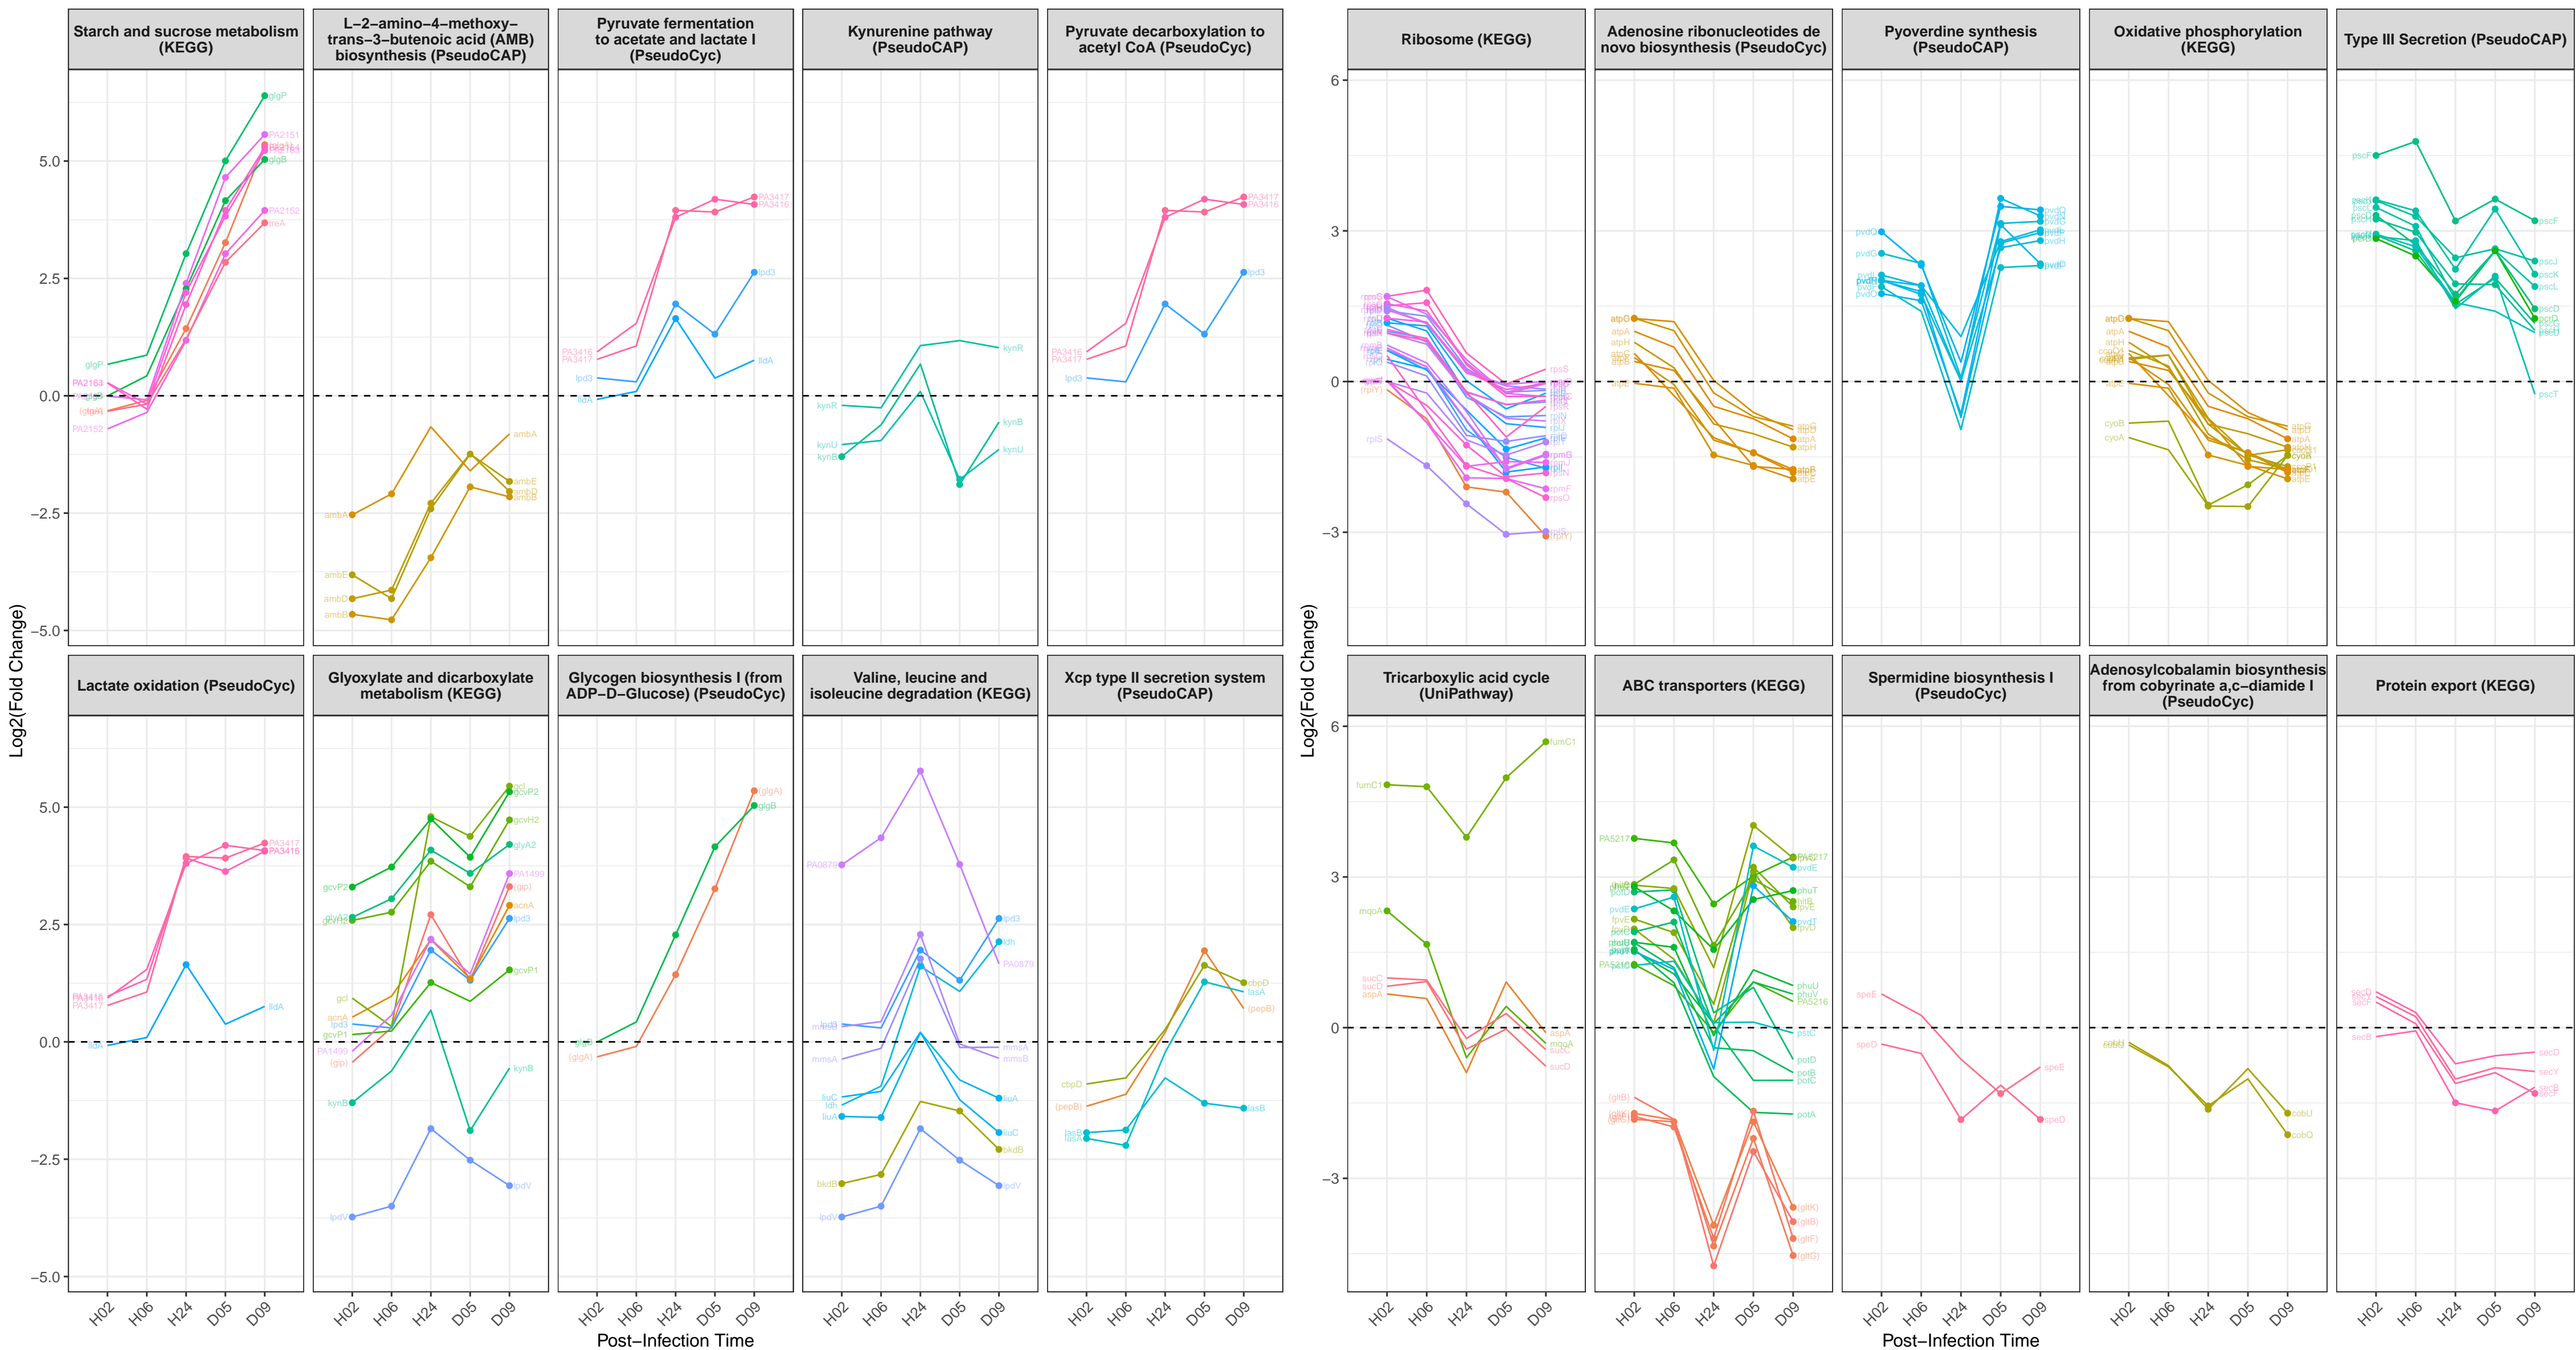

**S8 Fig.** Pathways up- and down-regulated from colonization (H2&H6) to acute (H24) infection. Pathways with over-represented up- or down-regulated genes in biofilm infection (H24:H2&6) are shown with their genes plotted vs. time after infection. Dashed lines indicate the expression level in log-phase culture. Solid circles indicate a significant gene expression difference (FDR < 0.05) between log-phase culture and wounds at each post-infection time.



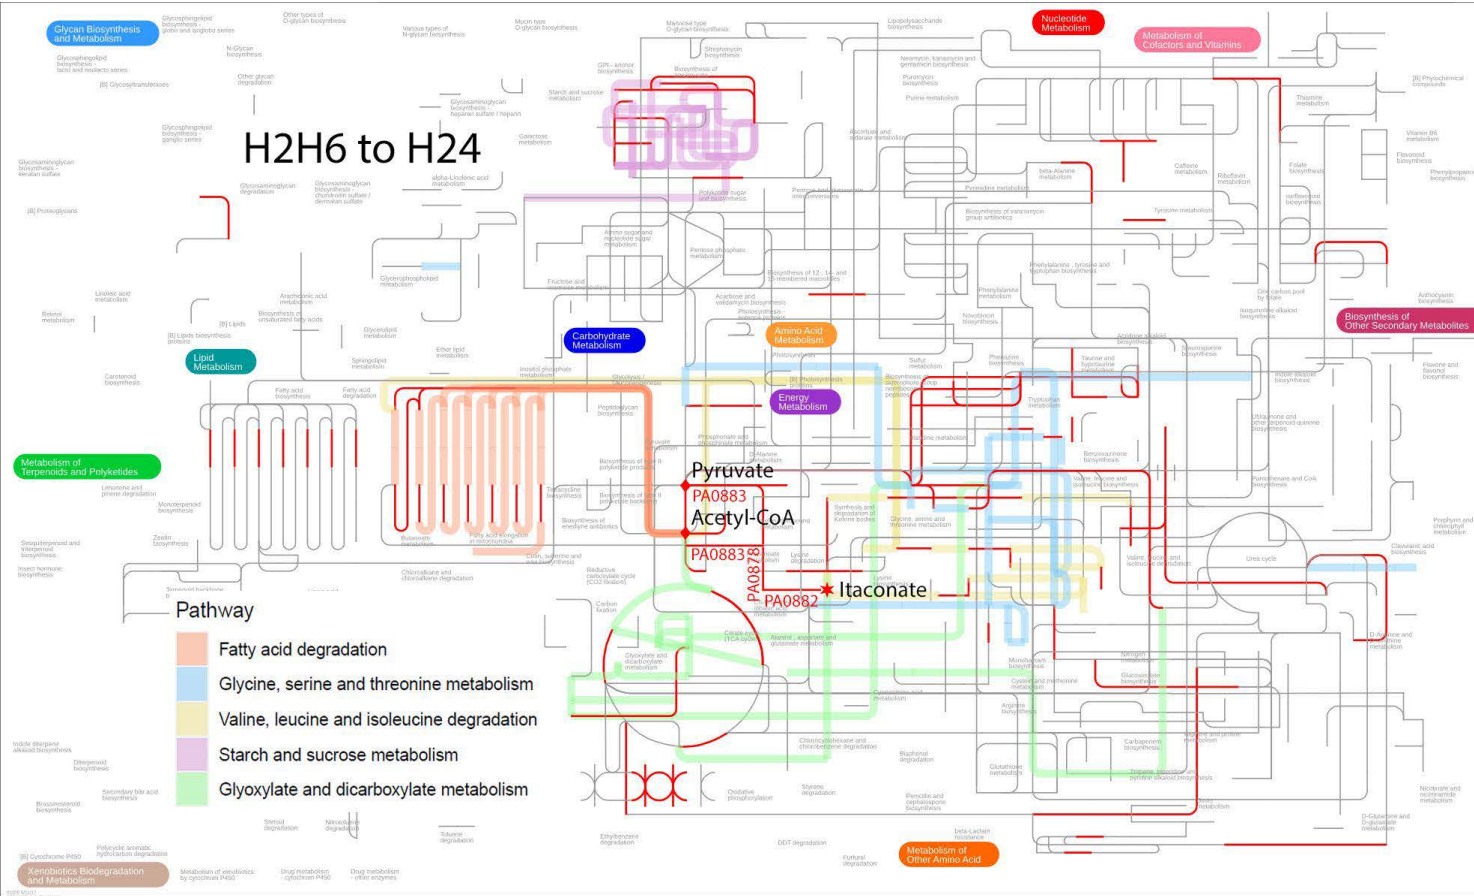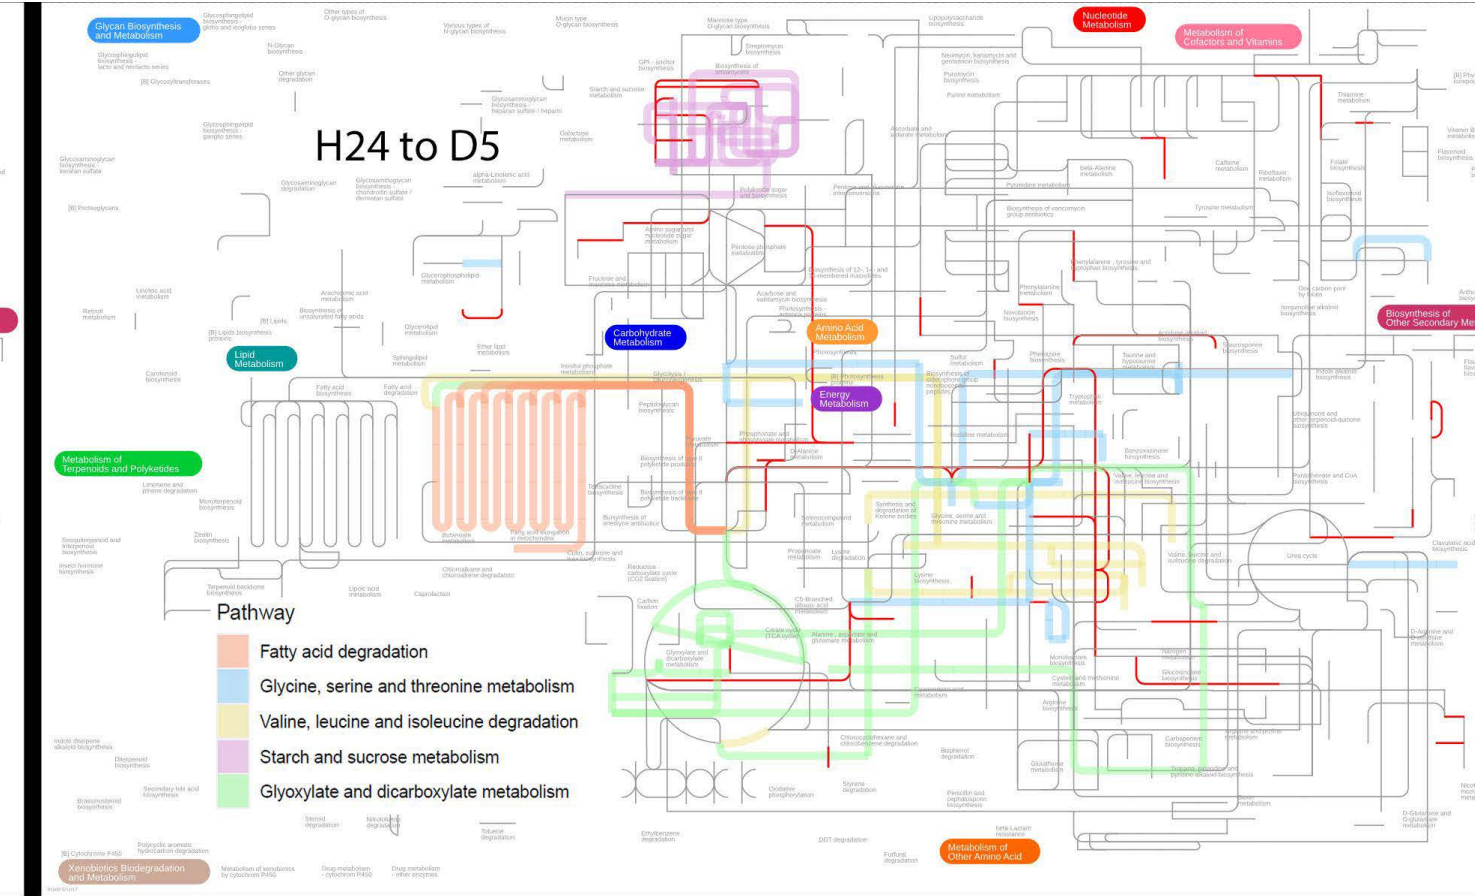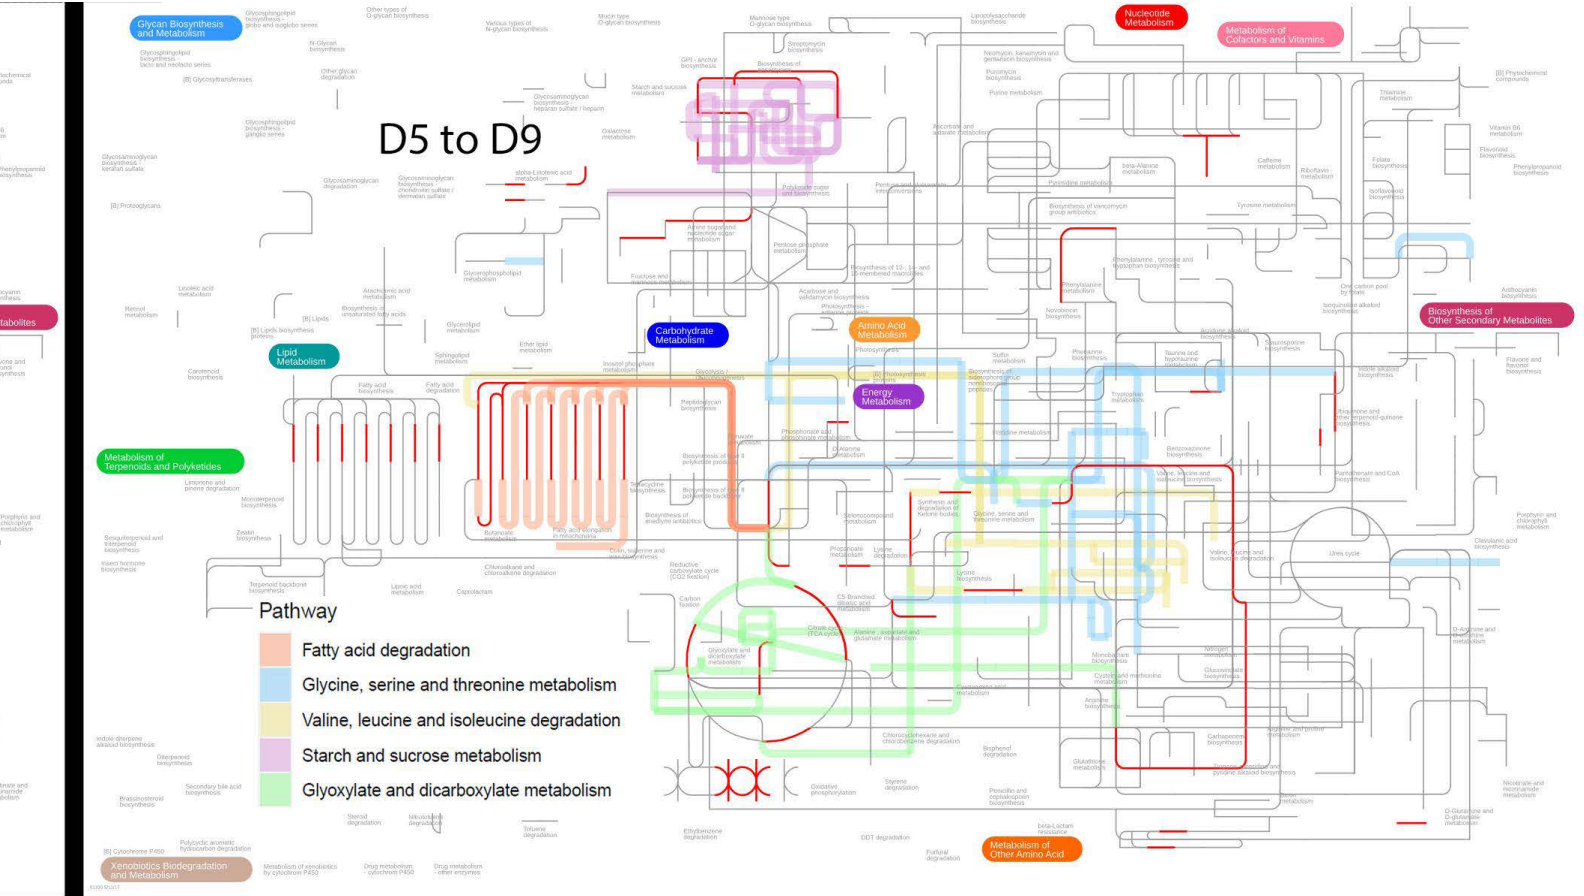



**S9 Fig.** Mapping of up-regulated genes onto KEGG pathways specific for *P. aeruginosa* strain PAO1. Up-regulated genes, about 450 for each comparison (selected by adjusting the FDR cutoff), were mapped (red lines) onto *P. aeruginosa* PAO1 metabolic pathways (pae01100) using Interactive Pathways Explorer v3 ([42](#)).
